# Supplementary material
Source: publisher figshare collection journal article supplement (https://aacr.figshare.com/articles/dataset/_/22758816)
Supplement: Supplementary file 1 [file 40438200]

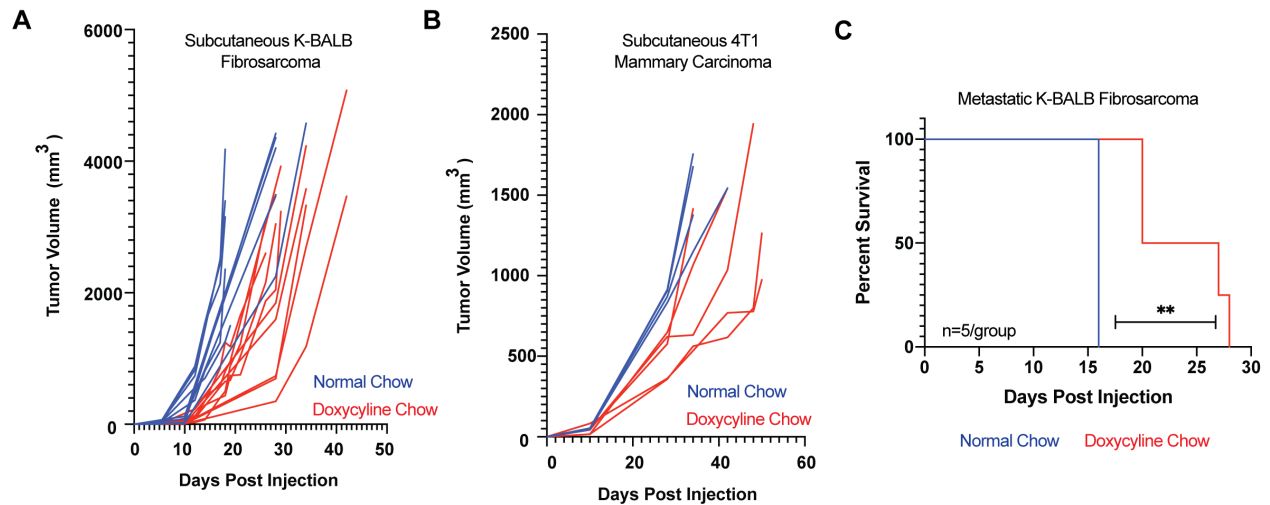

**Supplemental Figure S8: TR-APC induction in solid tumor models attenuates tumor growth kinetics and prolongs survival.** A-B, Growth of subcutaneous K-BALB (A) or 4T1 (B) with or without TR-APC induction during tumor growth. Tumors were measured 3 times per week by calipers, and tumor volume was calculated by multiplying the longest length in each dimension. Caliper measurements reflect the dimensions of the entire lesion, irrespective of tumor necrosis. C, Kaplan-Meier survival curves of syngeneic mice with metastatic K-BALB tumor growth following intravenous tumor inoculation and in vivo TR-APC induction. *P* values were calculated with the log-rank Mantel-Cox test. n=5 mice/group. \*\**P* ≤ 0.01.
